# Supplementary material for: Highlighting the Biotechnological Potential of Deep Oceanic Crust Fungi through the Prism of Their Antimicrobial Activity
Source: MDPI journal article supplement (doi:10.3390/md19080411), 2021-07-24

# Highlighting the biotechnological potential of deep oceanic crust fungi through the prism of their antimicrobial activity

Maxence Quemener<sup>1</sup>, Marie Dayras<sup>2</sup>, Nicolas Frotté<sup>1</sup>, Stella Debaets<sup>1</sup>, Christophe Lemeur<sup>1</sup>, Georges Barbier<sup>1</sup>, Virginia Edgcomb<sup>3</sup>, Mohamed Mehiri<sup>2</sup>, Gaëtan Burgaud<sup>1\*</sup>

<sup>1</sup> Univ Brest, Laboratoire Universitaire de Biodiversité et Ecologie Microbienne, France

<sup>2</sup> Université Côte d'Azur, CNRS, Institut de Chimie de Nice, UMR 7272, Marine Natural Products Team, 06108, Nice, France.

<sup>3</sup> Departments of Geology and Geophysics and Biology, Woods Hole Oceanographic Institution, Woods Hole, MA 02543, USA

\*Correspondence: gaetan.burgaud@univ-brest.fr; Tel.: +33290915148

Supplementary Figure S1: Comparative analyses of the HPLC-PDA-ELSD chemical fingerprints of the crude organic extracts F1 of a) (UBOCC-A-118169 *Penicillium olsonii*), b) (UBOCC-A-119011 *Penicillium olsonii*) and c) (UBOCC-A-118156 *Aspergillus conicus*) dichloromethane-ethyl acetate extracts obtained with HPLC-DAD-ELSD (Macherey-Nagel propylphenyl-C18, 250 x 4.6 mm; 5  $\mu$ m, gradient: CH<sub>3</sub>CN + 0.1% formic acid (FA), H<sub>2</sub>O + 0.1% FA, 10:90 to 100:0 in 30 mn).

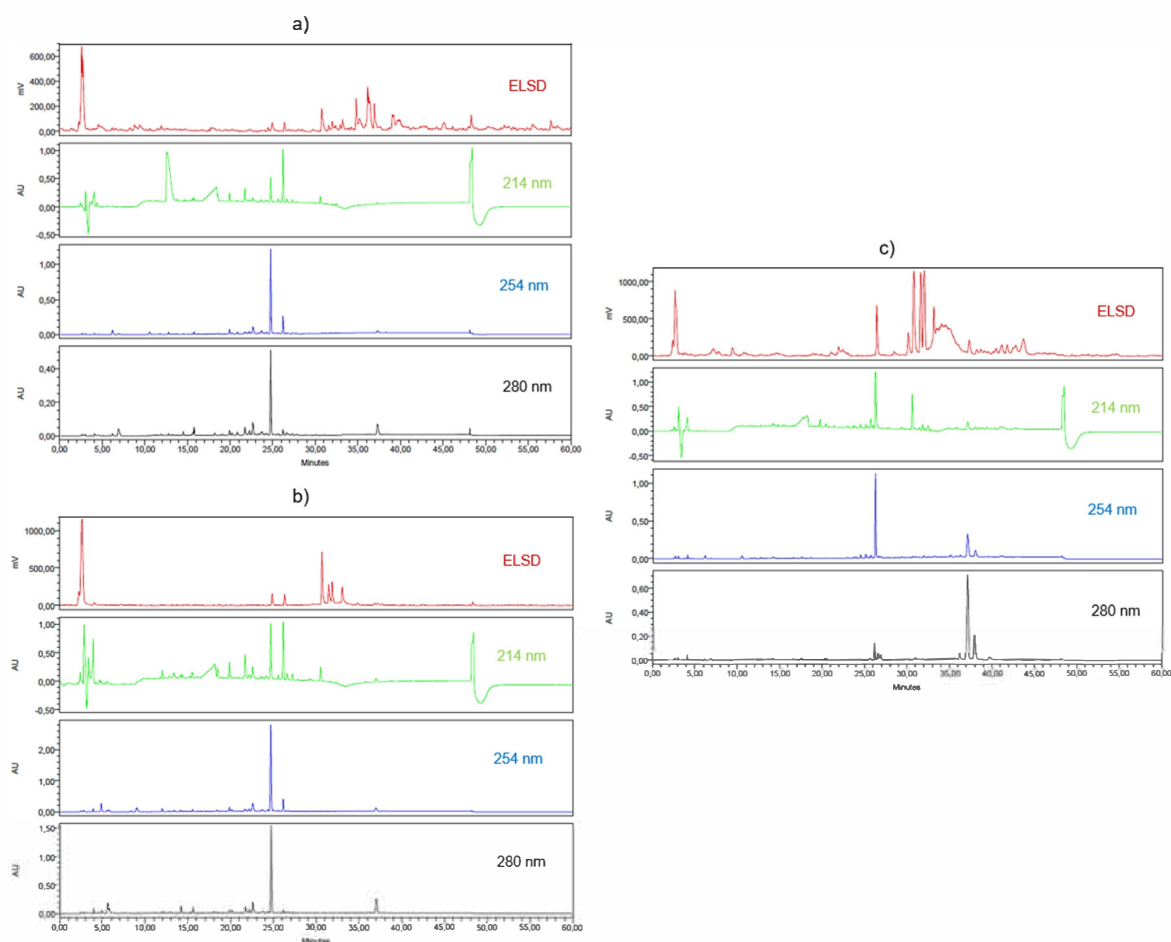

Supplement: s1 [file s1]
